# Supplementary material
Source: PubMed Central journal article supplement (PMC8161496)
Supplement: oc1c00197_si_001.pdf [file oc1c00197_si_001.pdf]

Supporting Information

**Modifications in an Emergency: The Role of N1-Methylpseudouridine in COVID-19 Vaccines**

Kellie D. Nance,<sup>1</sup> Jordan L. Meier<sup>1\*</sup>

<sup>1</sup>Chemical Biology Laboratory, Center for Cancer Research, National Cancer Institute, National Institutes of Health, 538 Chandler St, Frederick, MD 21702

\*Email: jordan.meier@nih.gov

| <b>Table of Contents</b> | <b><u>Page</u></b> |
|--------------------------|--------------------|
| Table of Contents        | S1                 |
| Supplementary Figures S1 | S1-4               |
| References               | S4                 |

**Figure S1:**

**Severe acute respiratory syndrome coronavirus 2 Spike Protein CDS<sup>1</sup>**

From YP\_009724390.1

Accession NC\_045512.2 21563..25384

```
ATGTTTGTTTTCTTGTTTTATTGCCACTAGTCTCTAGTCAGTGTGTTAATCTTACAACCAGA
ACTCAATTACCCCTGCATACACTAATTCTTTCACACGTGGTGTATTACCCTGACAAAGT
TTTCAGATCCTCAGTTTTACATTCAACTCAGGACTTGTTCTTACCTTTCTTTTCCAATGTTAC
TTGGTTCCATGCTATACATGTCTCTGGGACCAATGGTACTAAGAGGTTTGATAACCCTGTC
CTACCATTTAATGATGGTGTATTATTTGCTTCCACTGAGAAGTCTAACATAATAAGAGGCTG
GATTTTTGGTACTACTTTAGATTCTGAAGACCCAGTCCCTACTTATTGTTAATAACGCTACTAA
TGTTGTTATTAAGTCTGTGAATTTCAATTTTGTAATGATCCATTTTTGGGTGTTTATTACCA
CAAAAACAACAAAAGTTGGATGGAAAGTGAGTTCAGAGTTTATTCTAGTGCGAATAATTGCA
CTTTTGAATATGTCTCTCAGCCTTTTCTTATGGACCTTGAAGGAAAACAGGGTAATTTCAA
AATCTTAGGGAATTTGTGTTAAGAATATTGATGGTATTTTTAAAATATATTCTAAGCACACG
CCTATTAATTTAGTGCGTGATCTCCCTCAGGGTTTTTCGGCTTTAGAACCATTGGTAGATTT
GCCAATAGGTATTAACATCACTAGGTTTCAAACCTTACTTGCTTTACATAGAAGTTATTTGAC
TCCTGGTGATTCTTCTCAGGTTGGACAGCTGGTGCTGCAGCTTATTATGTGGGTTATCTTC
AACCTAGGACTTTTCTATTAATAATAATGAAAATGGAACCATTACAGATGCTGTAGACTGT
```

GCACTTGACCCTCTCTCAGAAACAAAGTGTACGTTGAAATCCTTCACTGTAGAAAAAGGAAT  
CTATCAAACCTTCTAACTTTAGAGTCCAACCAACAGAATCTATTGTTAGATTTCTAATATTAC  
AACTTTGTGCCCTTTTGGTGAAGTTTTTAACGCCACCAGATTTGCATCTGTTTATGCTTGGA  
ACAGGAAGAGAATCAGCAACTGTGTTGCTGATTATTCTGTCCTATATAATTCCGCATCATT  
TCCACTTTTAAGTGTATGGAGTGTCTCCTACTAAATTAATGATCTCTGCTTTACTAATGTC  
TATGCAGATTCATTTGTAATTAGAGGTGATGAAGTCAGACAAATCGCTCCAGGGCAAACCTG  
GAAAGATTGCTGATTATAATTATAAATTACCAGATGATTTTACAGGCTGCGTTATAGCTTGG  
AATTCTAACAATCTTGATTCTAAGGTTGGTGGTAATTATAATTACCTGTATAGATTGTTTAGG  
AAGTCTAATCTCAAACCTTTTGGAGAGAGATATTTCAACTGAAATCTATCAGGCCGGTAGCAC  
ACCTTGTAATGGTGTGGAAGGTTTTAATTGTTACTTTTCTTTACAATCATATGGTTTCCAACC  
CACTAATGGTGTGTTACCAACCATAACAGAGTAGTAGTACTTTCTTTTGAACCTTCTACATG  
CACCAGCAACTGTTTGTGGACCTAAAAAGTCTACTAATTTGGTTAAAAACAAATGTGTCAAT  
TTCAACTTCAATGGTTTAAACAGGCACAGGTGTTCTTACTGAGTCTAACAAAAAGTTTCTGCC  
TTTCCAACAATTTGGCAGAGACATTGCTGACACTACTGATGCTGTCCGTGATCCACAGACA  
CTTGAGATTCTTGACATTACCCATGTTCTTTTGGTGGTGTGAGTGTATAACACCAGGAAC  
AAATACTTCTAACCAGGTTGCTGTTCTTTATCAGGATGTTAACTGCACAGAAGTCCCTGTTG  
CTATTCATGCAGATCAACTTACTCCTACTTGGCGTGTATTCTACAGGTTCTAATGTTTTTC  
AACACGTGCAGGCTGTTTAAATAGGGGCTGAACATGTCAACAACCTCATATGAGTGTGACAT  
ACCCATTGGTGCAGGTATATGCGCTAGTTATCAGACTCAGACTAATTCTCCTCGGCCGGCA  
CGTAGTGTAGCTAGTCAATCCATCATTGCCTACACTATGTCACTTGGTGCAGAAAATTCAGT  
TGCTTACTCTAATAACTCTATTGCCATACCCACAAATTTTACTATTAGTGTACCACAGAAAT  
TCTACCAGTGTCTATGACCAAGACATCAGTAGATTGTACAATGTACATTTGTGGTGATTCAA  
CTGAATGCAGCAATCTTTTGTGCAATATGGCAGTTTTTGTACACAATTAACCGTGCTTTA  
ACTGGAATAGCTGTTGAACAAGACAAAAACCCCAAGAAGTTTTTGCACAAGTCAAACAAAT  
TTACAAAACACCACCAATTAAGATTTTTGGTGGTTTTAATTTTTACAAATATTACCAGATCC  
ATCAAACCAAGCAAGAGGTCATTTATTGAAGATCTACTTTTCAACAAAGTGACACTTGCAG  
ATGCTGGCTTCATCAAACAATATGGTGATTGCCTTGGTGATATTGCTGCTAGAGACCTCATT  
TGTGCACAAAAGTTTAAACGGCCTTACTGTTTTGCCACCTTTGCTCACAGATGAAATGATTGC  
TCAATACACTTCTGCACTGTTAGCGGGTACAATCACTTCTGGTTGGACCTTTGGTGCAGGT  
GCTGCATTACAAATACCATTTGCTATGCAATGGCTTATAGGTTTAAATGGTATTGGAGTTAC  
ACAGAATGTTCTCTATGAGAACCAAAAATTGATTGCCAACCAATTTAATAGTGCTATTGGCA  
AAATTC AAGACTCACTTTCTTCCACAGCAAGTGCACCTGGAAAACCTTCAAGATGTGGTCAAC  
CAAATGCACAAGCTTTAAACACGCTTGTTAAACAACCTTAGCTCCAATTTTGGTGCAATTT  
AAGTGTTTTTAAATGATATCCTTTACAGTCTTGACAAAGTTGAGGCTGAAGTGCAAATTGATA  
GGTTGATCACAGGCAGACTTCAAAGTTTGCAGACATATGTGACTCAACAATTAATTAGAGCT  
GCAGAAATCAGAGCTTCTGCTAATCTTGCTGCTACTAAAATGTCAGAGTGTGTACTTGGAC  
AATCAAAAAGAGTTGATTTTTGTGGAAAGGGCTATCATCTTATGTCTTCCCTCAGTCAGCA  
CCTCATGGTGTAGTCTTCTTGCATGTGACTTATGTCCCTGCACAAGAAAAGAACTTCACAAC  
TGCTCCTGCCATTTGTCATGATGGAAAAGCACACTTTCTCGTGAAGGTGTCTTTGTTTCAA  
ATGGCACACACTGGTTTGTAAACACAAAGGAATTTTTATGAACCACAAATCATTACTACAGAC  
AACACATTTGTGTCTGGTAACTGTGATGTTGTAATAGGAATTGTCAACAACACAGTTTATGA  
TCCTTTGCAACCTGAATTAGACTCATTCAAGGAGGAGTTAGATAAATATTTTAAGAATCATA  
CATCACCAGATGTTGATTTAGGTGACATCTCTGGCATTAAATGCTTCAGTTGTAAACATTCAA  
AAAGAAATTGACCGCCTCAATGAGGTTGCCAAGAATTTAAATGAATCTCTCATCGATCTCCA

AGAACTTGAAAGTATGAGCAGTATATAAAATGGCCATGGTACATTTGGCTAGGTTTTATAG  
CTGGCTTGATTGCCATAGTAATGGTGACAATTATGCTTTGCTGTATGACCAGTTGCTGTAGT  
TGTCTCAAGGGCTGTTGTTCTTGTGGATCCTGCTGCAAATTTGATGAAGACGACTCTGAGC  
CAGTGCTCAAAGGAGTCAAATTACATTACACATAA

Base count:

A: 1125

C: 723

T: 1272

G:703

### BioNTech bnt162b2 Spike Protein CDS<sup>2</sup>

ATGTTTCGTGTTCCCTGGTGCTGCTGCCTCTGGTGTCCAGCCAGTGTGTGAACCTGACCACC  
AGAACACAGCTGCCTCCAGCCTACACCAACAGCTTTACCAGAGGCGTGTACTACCCCGAC  
AAGGTGTTTCAGATCCAGCGTGTGCACTCTACCCAGGACCTGTTCCCTGCCTTTCTTCAGC  
AACGTGACCTGGTTCCACGCCATCCACGTGTCCGGCACCAATGGCACCAAGAGATTCGAC  
AACCCCGTGCTGCCCTTCAACGACGGGGTGTACTTTGCCAGCACCGAGAAGTCCAACATC  
ATCAGAGGCTGGATCTTCGGCACCACTGGACAGCAAGACCCAGAGCCTGCTGATCGTG  
ACAACGCCACCAACGTGGTCATCAAAGTGTGCGAGTTCCAGTTCTGCAACGACCCCTTC  
CTGGGCGTCTACTACCACAAGAACAACAAGAGCTGGATGGAAAGCGAGTTCCGGGTGTAC  
AGCAGCGCCAACAACACTGCACCTTCGAGTACGTGTCCAGCCTTTCTGATGGACCTGGAA  
GGCAAGCAGGGCAACTTCAAGAACCTGCGCGAGTTTCGTGTTTAAGAACATCGACGGCTAC  
TTCAAGATCTACAGCAAGCACACCCCTATCAACCTCGTGCGGGATCTGCCTCAGGGCTTC  
TCTGCTCTGGAACCCCTGGTGGATCTGCCCATCGGCATCAACATCACCCGGTTTCAGACA  
CTGCTGGCCCTGCACAGAAGCTACCTGACACCTGGCGATAGCAGCAGCGGATGGACAGC  
TGGTGCCGCGCTTACTATGTGGGCTACCTGCAGCCTAGAACCTTCTGCTGAAGTACAA  
CGAGAACGGCACCATCACCGACGCCGTGGATTGTGCTCTGGATCCTCTGAGCGAGACAAA  
GTGCACCCTGAAGTCCTTACCCTGGAAAAGGGCATCTACCAGACCAGCAACTTCCGGGG  
CAGCCACCGAATCCATCGTGCGGTTCCTCAATATCACCAATCTGTGCCCTTCGGCGAG  
GTGTTCAATGCCACCAGATTCGCCTCTGTGTACGCCTGGAACCGGAAGCGGATCAGCAAT  
TGCGTGGCCGACTACTCCGTGCTGTACAACCTCCGCCAGCTTCAGCACCTTCAAGTGCTAC  
GGCGTGTCCCCTACCAAGCTGAACGACCTGTGCTTCAAAACGTGTACGCCGACAGCTTC  
GTGATCCGGGGAGATGAAGTGCGGCAGATTGCCCTGGACAGACAGGCAAGATCGCCGA  
CTACAACATAAGCTGCCCGACGACTTACCAGGCTGTGTGATTGCCTGGAACAGCAACAA  
CCTGGACTCCAAAGTCGGCGGCAACTACAATTACCTGTACCGGCTGTTCCGGAAGTCCAA  
TCTGAAGCCCTTCGAGCGGGACATCTCCACCGAGATCTATCAGGCCGGCAGCACCCCTTG  
TAACGGCGTGGAAAGGCTTCAACTGCTACTTCCCCTGCAGTCCTACGGCTTTTCAGCCACA  
AATGGCGTGGGCTATCAGCCCTACAGAGTGGTGGTGTGAGCTTCGAACTGCTGCATGCC  
CCTGCCACAGTGTGCGGCCCTAAGAAAAGCACCAATCTCGTGAAGAACAATGCGTGAAC  
TTCAACTTCAACGGCCTGACCGGCACCGGCGTGCTGACAGAGAGCAACAAGAAGTTCCTG  
CCATTCCAGCAGTTTGGCCGGGATATCGCCGATACCACAGACGCCGTTAGAGATCCCAG  
ACACTGGAAATCCTGGACATCACCCCTTGCAGCTTCGGCGGAGTGTCTGTGATCACCCCT  
GGCACCAACACCAGCAATCAGGTGGCAGTGTGTACCAGGACGTGAACTGTACCGAAGTG

CCCGTGGCCATTACGCCGATCAGCTGACACCTACATGGCGGGTGTACTCCACCGGCAGC  
AATGTGTTTCAGACCAGAGCCGGCTGTCTGATCGGAGCCGAGCACGTGAACAATAGCTAC  
GAGTGCGACATCCCCATCGGCGCTGGAATCTGCGCCAGCTACCAGACACAGACAAACAGC  
CCTCGGAGAGCCAGAAGCGTGGCCAGCCAGAGCATCATTGCCTACACAATGTCTCTGGGC  
GCCGAGAACAGCGTGGCCTACTCCAACAACCTCTATCGCTATCCCCACCAACTTCACCATC  
AGCGTGACCACAGAGATCCTGCCTGTGTCCATGACCAAGACCAGCGTGGACTGCACCATG  
TACATCTGCGGGCATTCCACCGAGTGCTCCAACCTGCTGCTGCAGTACGGCAGCTTCTGC  
ACCCAGCTGAATAGAGCCCTGACAGGGATCGCCGTGGAACAGGACAAGAACACCCAAGA  
GGTGTTCGCCCAAGTGAAGCAGATCTACAAGACCCCTCCTATCAAGGACTTCGGCGGGCTT  
CAATTTTCAGCCAGATTCTGCCCGATCCTAGCAAGCCCAGCAAGCGGAGCTTCATCGAGGA  
CCTGCTGTTCAACAAAGTGACACTGGCCGACGCCGGCTTCATCAAGCAGTATGGCGATTG  
TCTGGGCGACATTGCCGCCAGGGATCTGATTTGCGCCCAGAAGTTTAACGGACTGACAGT  
GCTGCCTCCTCTGCTGACCGATGAGATGATCGCCCAGTACACATCTGCCCTGCTGGCCGG  
CACAATCACAAGCGGCTGGACATTTGGAGCAGGCGCCGCTCTGCAGATCCCCTTTGCTAT  
GCAGATGGCCTACCGGTTCAACGGCATCGGAGTGACCCAGAATGTGCTGTACGAGAACCA  
GAAGCTGATCGCCAACCAGTTCAACAGCGCCATCGGCAAGATCCAGGACAGCCTGAGCAG  
CACAGCAAGCGCCCTGGGAAAGCTGCAGGACGTGGTCAACCAGAATGCCCAGGCACTGA  
ACACCCTGGTCAAGCAGCTGTCTCCAACCTTCGGCGCCATCAGCTCTGTGCTGAACGATAT  
CCTGAGCAGACTGGACCCTCCTGAGGCCGAGGTGCAGATCGACAGACTGATCACAGGCA  
GACTGCAGAGCCTCCAGACATACGTGACCCAGCAGCTGATCAGAGCCGCCGAGATTAGAG  
CCTCTGCCAATCTGGCCGCCACCAAGATGTCTGAGTGTGTGCTGGGCCAGAGCAAGAGAG  
TGGACTTTTTCGGCAAGGGCTACCACCTGATGAGCTTCCCTCAGTCTGCCCTCACGGCG  
TGGTGTCTTCTGCACGTGACATATGTGCCCGCTCAAGAGAAGAATTCACCACCGCTCCAGC  
CATCTGCCACGACGGCAAAGCCCACTTTCCTAGAGAAGGCGTGTTCGTGTCCAACGGCAC  
CCATTGGTTTCGTGACACAGCGGAACTTCTACGAGCCCCAGATCATCACCACCGACAACAC  
CTTCGTGTCTGGCAACTGCGACGTCTGATCGGCATTGTGAACAATACCGTGTACGACCCT  
CTGCAGCCCAGCTGGACAGCTTCAAAGAGGAACTGGACAAGTACTTTAAGAACCACACA  
AGCCCCGACGTGGACCTGGGCGATATCAGCGGAATCAATGCCAGCGTCTGTAACATCCAG  
AAAGAGATCGACCGGCTGAACGAGGTGGCCAAGAATCTGAACGAGAGCCTGATCGACCTG  
CAAGAACTGGGGAAGTACGAGCAGTACATCAAGTGGCCCTGGTACATCTGGCTGGGCTTT  
ATCGCCGACTGATTGCCATCGTGTGATGGTCAACAATCATGCTGTGTTGCATGACCAGCTGC  
TGTAAGCTGCCTGAAGGGCTGTTGTAGCTGTGGCAGCTGCTGCAAGTTCGACGAGGACGAT  
TCTGAGCCCGTGTGTAAGGGCGTGAAGACTGCACTACACATGA

Base count:

A: 915

C: 1186

T: 729

G: 992

- (1) Severe acute respiratory syndrome coronavirus 2 isolate Wuhan-Hu-1, co - Nucleotide - NCBI [https://www.ncbi.nlm.nih.gov/nuccore/NC\\_045512.2](https://www.ncbi.nlm.nih.gov/nuccore/NC_045512.2) (accessed Feb 8, 2021).
- (2) World Health Organization. Messenger RNA Encoding the Full-Length SARS-CoV-2 Spike Glycoprotein. *INN*, 2020, 11889.
